# Supplementary material for: Evaluation of ferrocenyl phosphines as potent antimalarialstargeting the digestive vacuole function ofPlasmodium falciparum
Source: Royal Society of Chemistry journal article supplement (doi:10.1039/c8dt04263b), 2018-12-18
Supplement: c8dt04263b2.pdf [file c8dt04263b2.pdf]

A

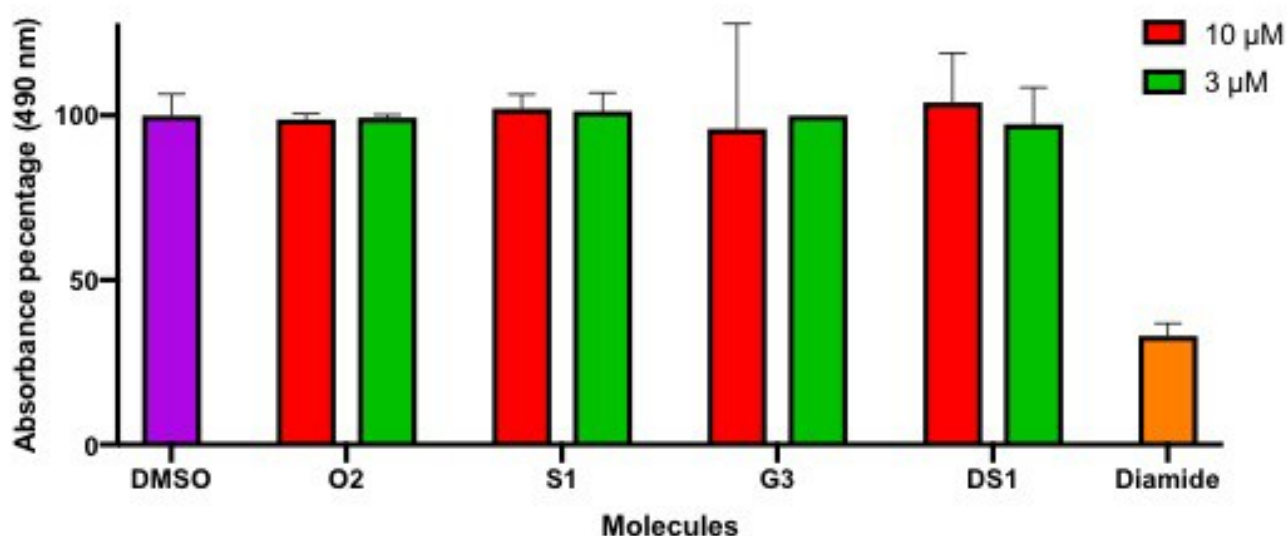

B

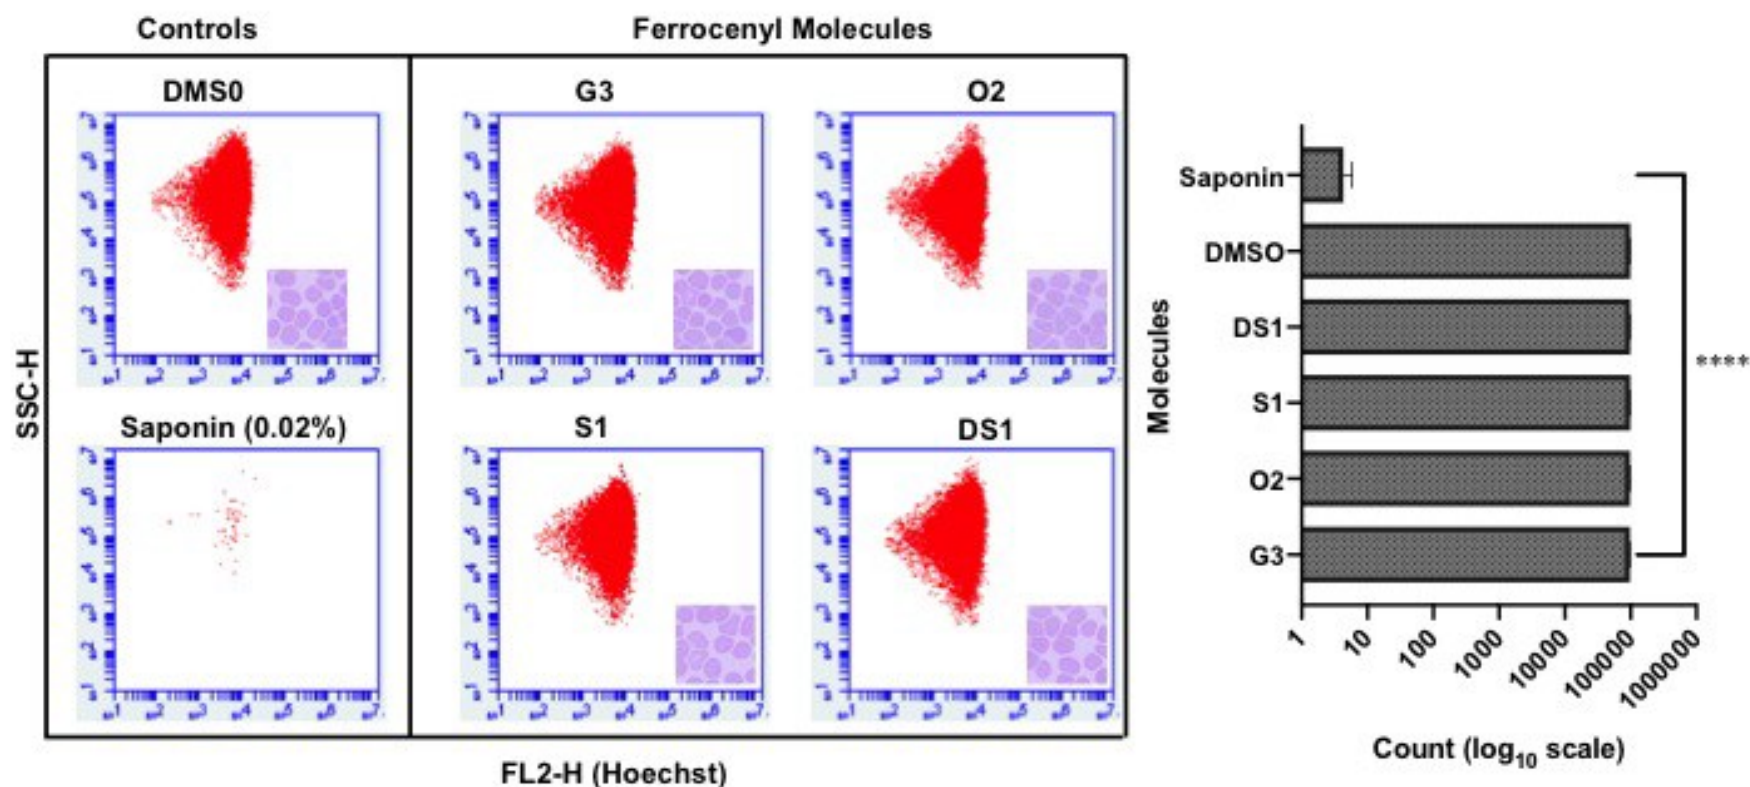

**Supplemental Figure 2: Most potent molecules from the Ferrocenyl phosphene library are non toxic to mammalian cells** (A) MTS based cell viability assay was carried out as mentioned in the manuscript. The bar graph represents the mean absorbance values (in duplicates) normalized to vehicle alone treated DMSO samples. Evidently, none of the compounds induce cytotoxicity at the concentrations below 10μM (B) Flow cytometry plots of RBCs treated with ferrocenyl molecules at 30μM and the corresponding Giemsa images indicate that RBCs are not plasmolyzed while the treatment of saponin (0.02%) completely lysed the RBCs as expected. Bar graph on the right depicts the cell count obtained from the flow cytometer. RM one-way ANOVA with Dunnett's multiple comparisons indicate the statistical significance between Saponin and the rest of the molecules (\*\*\*\*, <math><0.0001</math>;  $\alpha = 0.05$ )
